# Supplementary material for: Segment-specific optogenetic stimulation in Drosophila melanogaster with linear arrays of organic light-emitting diodes
Source: PubMed Central journal article supplement (PMC7721879; doi:10.1038/s41467-020-20013-6), 2020-12-07
Supplement: 41467_2020_20013_MOESM3_ESM.pdf [file 41467_2020_20013_MOESM3_ESM.pdf]

**Title:** Supplementary Movie 1.

**Description:** Whole animal stimulation during forward crawling in a GtACR2-expressing larva using a large OLED pixel. Upon stimulation, relaxation of the larva or slow-down of muscle contraction waves were recorded. The 10 s-long periods during which the OLED is on are indicated in the video. OLED power density: 15  $\mu\text{W mm}^{-2}$ .

**Title:** Supplementary Movie 2.

**Description:** Dose-response upon whole animal stimulation of a CsChrimson-expressing larva using a large OLED pixel. The 3 s-long periods during which the OLED is on, the brightness, and the larval response are indicated in the video.

**Title:** Supplementary Movie 3.

**Description:** Dose-response upon whole animal stimulation of a control larva using a large OLED pixel. The 10 s-long periods during which the OLED is on, the brightness, and the larval response are indicated in the video.

**Title:** Supplementary Movie 4.

**Description:** Local stimulation of a CsChrimson-expressing larva in segment A5 using a microstructured OLED leads to a temporary stop of an incoming forward muscle contraction wave. Bottom: Location of the muscle contraction wave over time. The 3 s-long period during which the OLED is on is indicated in the video. OLED power density: 15  $\mu\text{W mm}^{-2}$ .

**Title:** Supplementary Movie 5.

**Description:** Switching the direction of locomotion of a CsChrimson-expressing larva by alternating stimulation of anterior and posterior segments with a microstructured OLED. Red lines indicate the current position of the muscle contraction wave. The 3 s-long periods during which the OLED is on are indicated in the video. OLED power density: 15  $\mu\text{W mm}^{-2}$ .

**Title:** Supplementary Movie 6.

**Description:** Wave-like optical stimulation of 5-40-GAL4 > CsChrimson larvae from posterior to anterior by targeted local stimulation with a microstructured OLED. The location and periods during which the OLEDs were on are indicated in the video. OLED power density: 30  $\mu\text{W mm}^{-2}$ .
